# Supplementary material
Source: PubMed Central journal article supplement (PMC8015413)
Supplement: NIHMS1681926-supplement-Supplemental_Material.pdf [file NIHMS1681926-supplement-Supplemental_Material.pdf]

**Supplemental Material for**

**Age Differences in Loneliness from Late Adolescence to Oldest Old Age:**

Maike Luhmann<sup>1</sup> & Louise C. Hawkley<sup>2</sup>

<sup>1</sup> University of Cologne

<sup>2</sup> NORC at the University of Chicago

In press at *Developmental Psychology*

Feb 23, 2016

Table S1. Regression coefficients for a model without income.

| Variable                                  | Regression coefficients |           |
|-------------------------------------------|-------------------------|-----------|
|                                           | <i>B</i>                | <i>SE</i> |
| (Intercept)                               | -0.28***                | 0.023     |
| Female                                    | 0.071***                | 0.015     |
| Socioeconomic status                      |                         |           |
| Years of education                        | -0.006                  | 0.003     |
| Work status                               |                         |           |
| Working full-time                         | 0.002                   | 0.020     |
| Other work status                         | 0.025                   | 0.024     |
| Relationship status                       |                         |           |
| Not living with a partner                 | 0.15***                 | 0.038     |
| Single                                    | 0.32***                 | 0.035     |
| Living arrangements                       |                         |           |
| Household size                            |                         |           |
| 1 person                                  | 0.045                   | 0.037     |
| 3 or more persons                         | 0.005                   | 0.030     |
| Living with children                      | 0.13***                 | 0.033     |
| Functional limitations                    |                         |           |
| somewhat                                  | 0.22***                 | 0.020     |
| severe                                    | 0.56***                 | 0.032     |
| Social engagement                         |                         |           |
| Volunteering                              | -0.019*                 | 0.008     |
| Political engagement                      | -0.010                  | 0.017     |
| Religious engagement                      | -0.034***               | 0.010     |
| No. of friends                            | -0.025***               | 0.002     |
| Contact frequency                         |                         |           |
| Face-to-face contact with friends         | -0.124***               | 0.010     |
| Face-to-face contact with relatives       | -0.060***               | 0.008     |
| Contact with friends and relatives abroad | 0.026***                | 0.007     |
| Use of social online networks             | 0.048***                | 0.005     |

Notes. All continuous predictors were centered on the mean of the total sample. Standard errors are adjusted for clustering. Categorical predictors were dummy-coded with the following reference groups: gender: male; work status: not working; household size: 2 persons; relationship status: living with partner; functional limitations: not at all. \*\*\*  $p < .001$ , \*\*  $p < .01$ , \*  $p < .05$ .

Table S2. Tests of interactions between age and different predictors in two random subsamples using alternative age groups (< 35 years, 35-80 years, > 80 years).

| Variable               | Sample A |                        |                        |          |              | Sample B |                        |                        |          |              |
|------------------------|----------|------------------------|------------------------|----------|--------------|----------|------------------------|------------------------|----------|--------------|
|                        | <i>F</i> | <i>df</i> <sub>1</sub> | <i>df</i> <sub>2</sub> | <i>p</i> | Significance | <i>F</i> | <i>df</i> <sub>1</sub> | <i>df</i> <sub>2</sub> | <i>p</i> | Significance |
| Gender                 | 0.73     | 2                      | 7937                   | .480     |              | 6.72     | 2                      | 8145                   | .001     | **           |
| Income                 | 0.62     | 2                      | 7937                   | .536     |              | 0.09     | 2                      | 8145                   | .912     |              |
| Education              | 2.19     | 2                      | 7937                   | .112     |              | 2.24     | 2                      | 8145                   | .107     |              |
| Work status            | 8.41     | 3                      | 7936                   | .000     | ***          | 3.68     | 3                      | 8144                   | .012     | *            |
| Relationship status    | 2.26     | 4                      | 7935                   | .060     |              | 0.88     | 4                      | 8143                   | .474     |              |
| Household size         | 2.28     | 4                      | 7935                   | .058     |              | 1.25     | 4                      | 8143                   | .288     |              |
| Children in household  | 4.25     | 2                      | 7937                   | .014     | *            | 3.33     | 2                      | 8145                   | .036     | *            |
| Functional limitations | 2.20     | 4                      | 7935                   | .066     |              | 1.44     | 4                      | 8143                   | .217     |              |
| Volunteering           | 0.15     | 2                      | 7933                   | .861     |              | 0.39     | 2                      | 8141                   | .674     |              |
| Political engagement   | 2.45     | 2                      | 7933                   | .087     |              | 2.21     | 2                      | 8141                   | .110     |              |
| Religious engagement   | 10.57    | 2                      | 7933                   | .000     | ***          | 3.49     | 2                      | 8141                   | .030     | *            |
| No. of friends         | 0.32     | 2                      | 7937                   | .724     |              | 3.41     | 2                      | 8145                   | .033     | *            |
| Contact with friends   | 3.48     | 2                      | 7931                   | .031     | *            | 1.77     | 2                      | 8139                   | .170     |              |
| Contact with relatives | 1.02     | 2                      | 7931                   | .361     |              | 8.77     | 2                      | 8139                   | .000     | ***          |
| Contact abroad         | 4.01     | 2                      | 7931                   | .018     | *            | 3.05     | 2                      | 8139                   | .048     | *            |
| Contact online         | 0.40     | 2                      | 7931                   | .673     |              | 5.08     | 2                      | 8139                   | .006     | **           |

Notes. \*\*\*  $p < .001$ , \*\*  $p < .01$ , \*  $p < .05$ . Interactions that were significant in both subsamples were followed up with Tukey adjusted post-hoc comparisons. The effect of work status was similar to the one found for the age groups used in the main article, with loneliness levels among young adults being significantly lower for those in other occupations than for those working full-time or not at all, and with loneliness levels among middle-aged adults being significantly lower for those not working at all than for those working full-time or in other occupations. Due to the low number of individuals working full-time or working in other occupations, no post-hoc comparisons were conducted among older adults. For child status, parents were lonelier than non-parents among young and old adults, but not among middle-aged adults. More frequent religious engagement was associated with lower levels of loneliness in the middle age group only but not in the other age groups. Frequency of contact with people abroad was positively associated with loneliness among middle-aged and older adults, but not among younger adults. Furthermore, the association was significantly stronger in the old age group than in the other two groups.

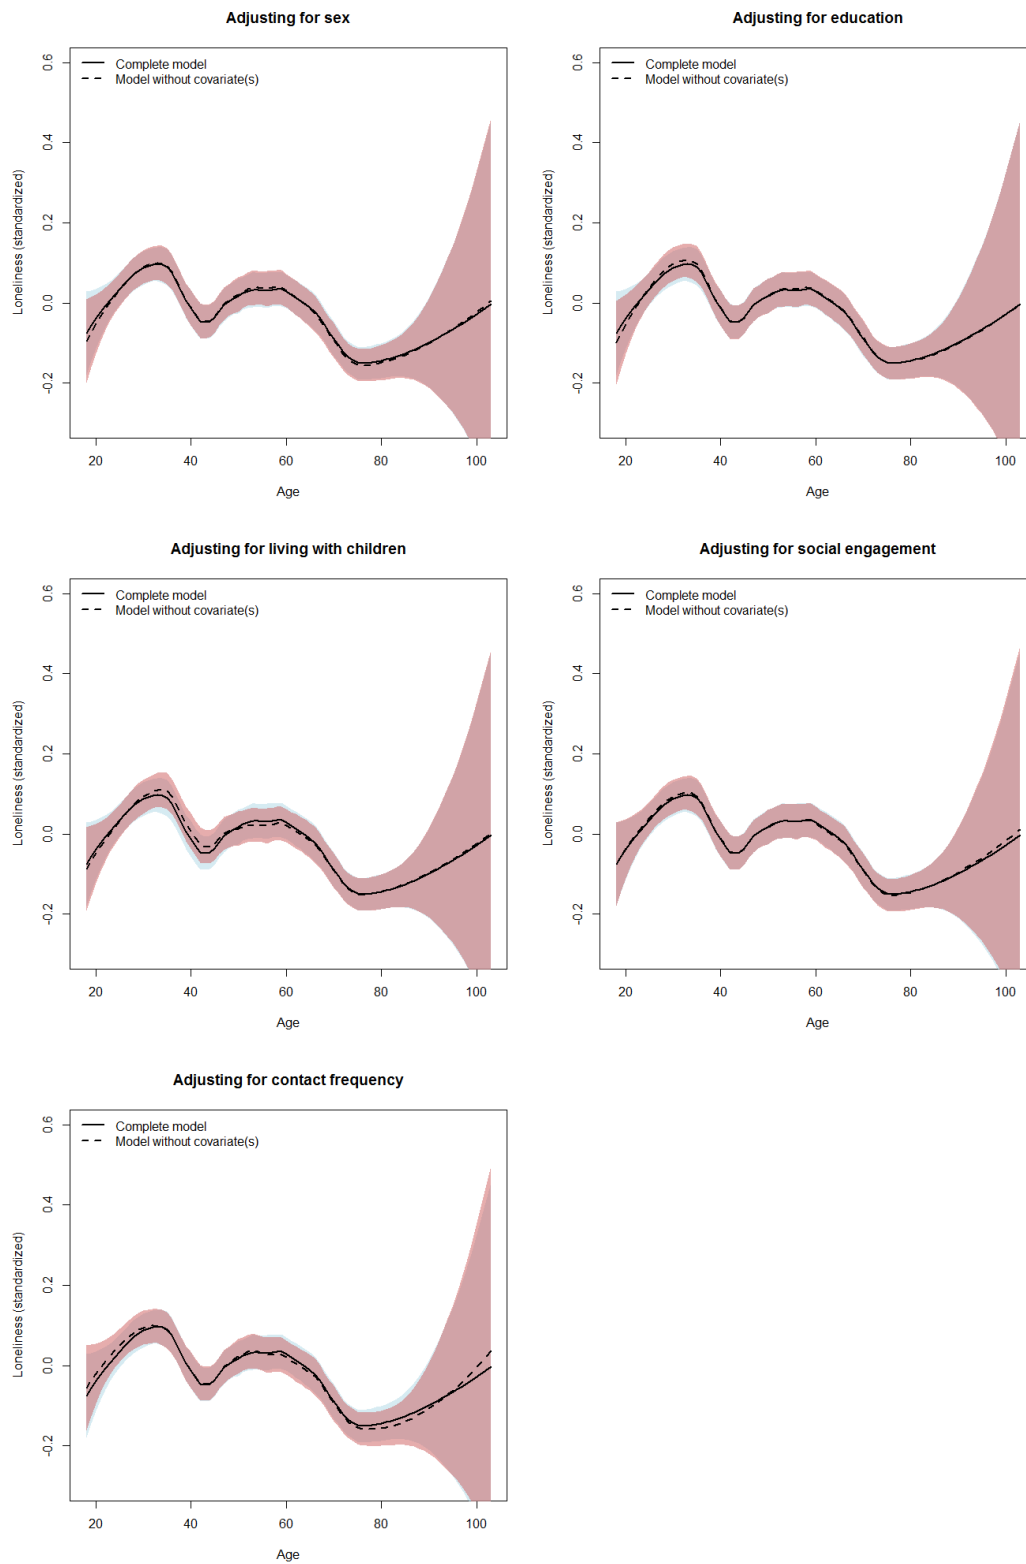

*Figure S1.* Age distribution of adjusted loneliness scores without adjusting for specific covariates (dashed line) and with adjusting for specific covariates (solid line). The confidence bands reflect 95% confidence intervals.

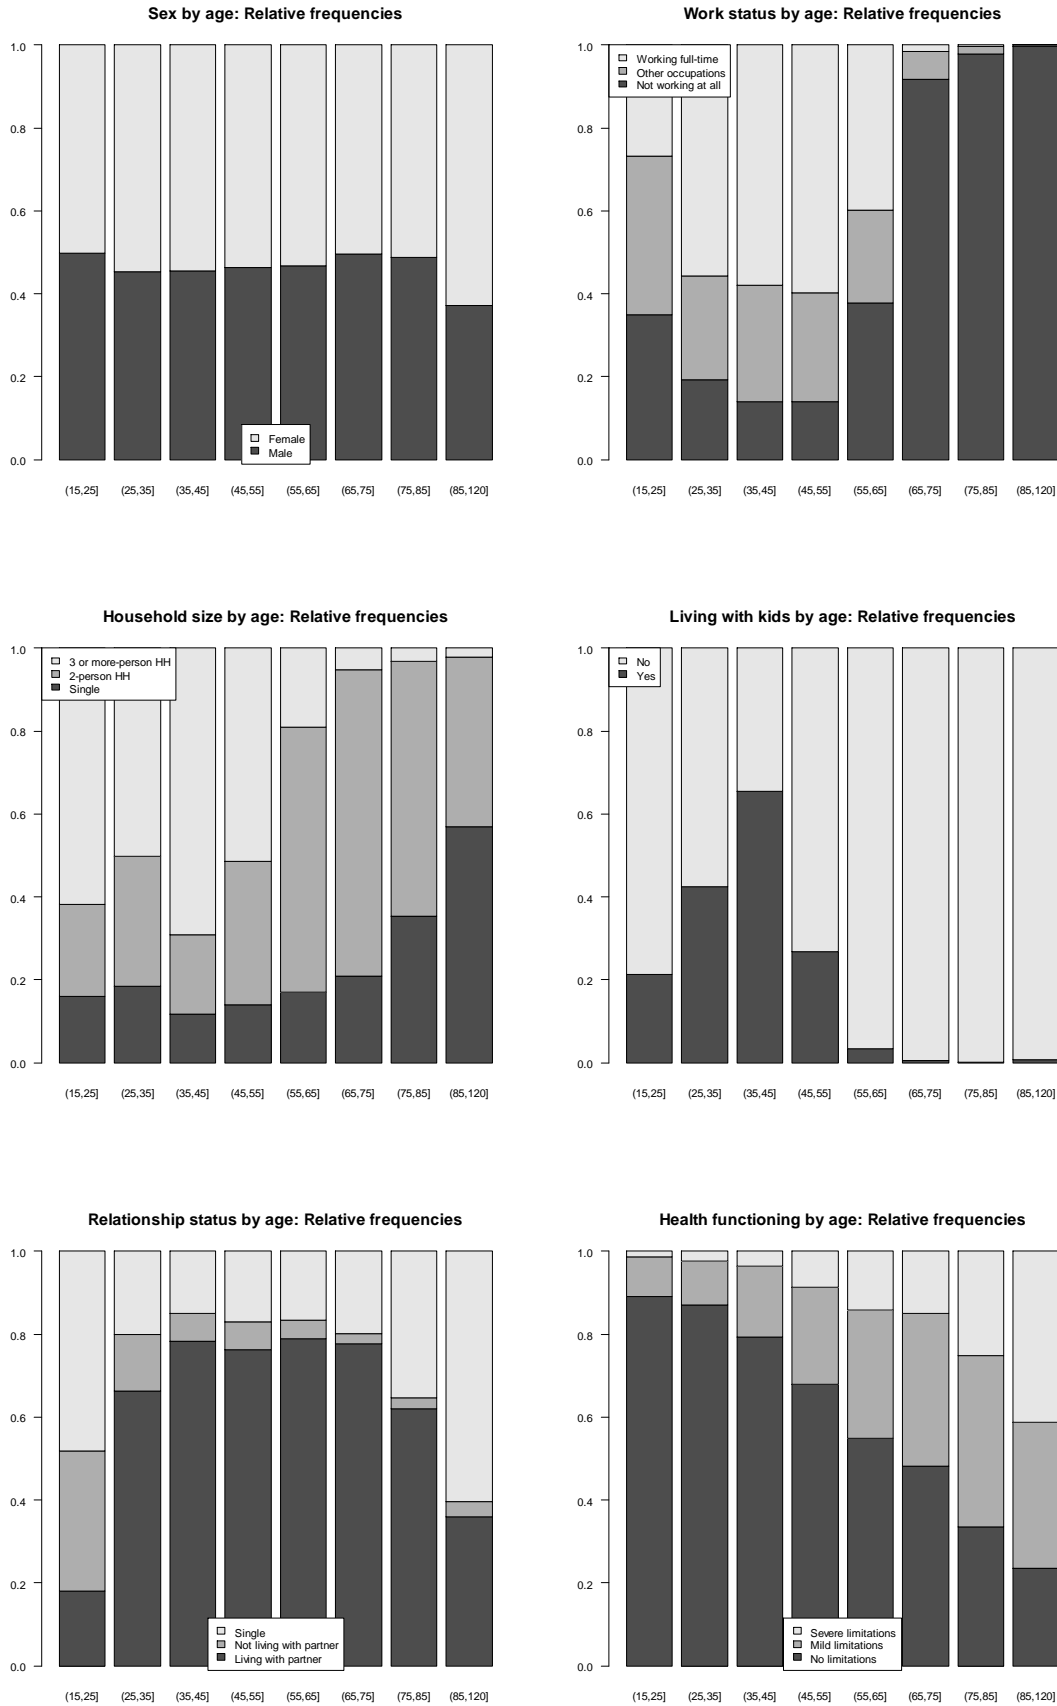

Figure S2. Relative frequencies of all categorical predictors by age decade.

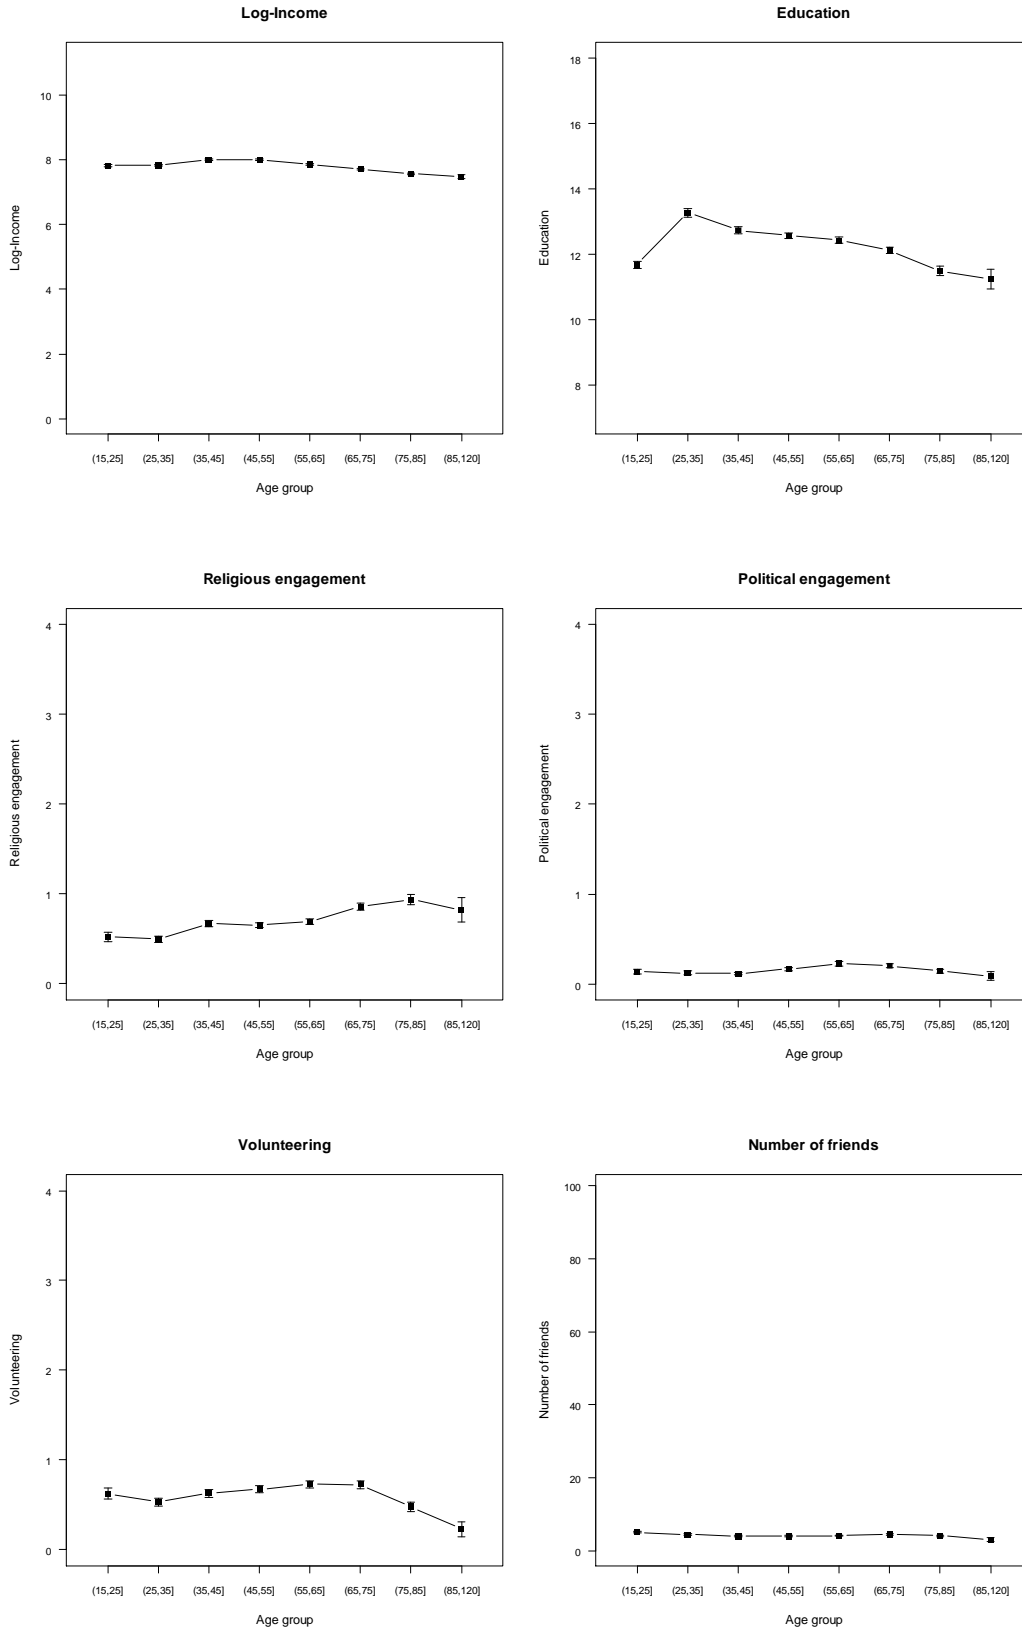

Figure S3. Mean levels for income, education, social engagement and number of friends by age decade. Error bars reflect 95% confidence intervals.

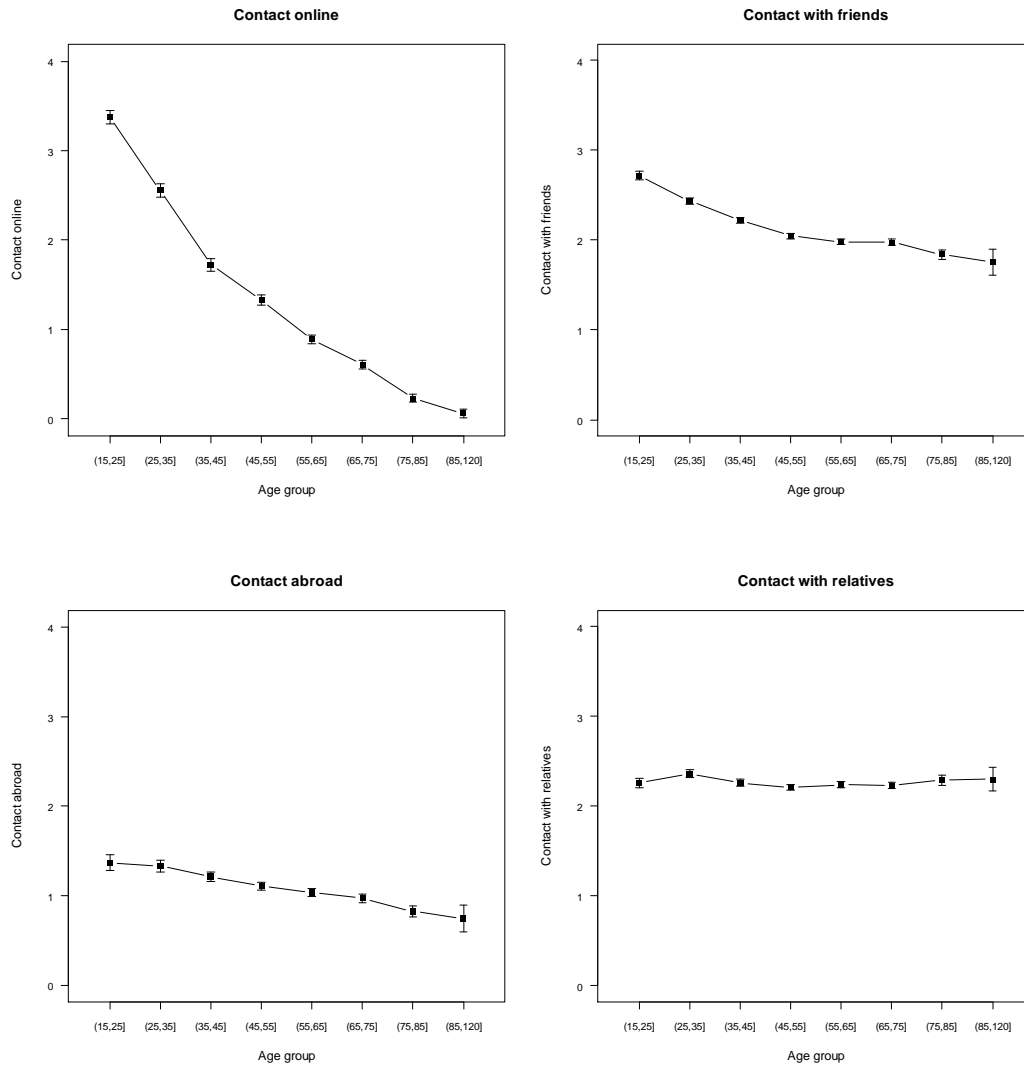

Figure S4. Mean levels for four forms of social contact frequency by age decade. Error bars reflect 95% confidence intervals.
